# Supplementary material for: Weedy Rice as a Novel Gene Resource: A Genome-Wide Association Study of Anthocyanin Biosynthesis and an Evaluation of Nutritional Quality
Source: Front Plant Sci. 2020 Jun 11;11:878. doi: 10.3389/fpls.2020.00878 (PMC7300295; doi:10.3389/fpls.2020.00878)
Supplement: TABLE S1 — Material information of the GWAS populations. [file Data_Sheet_1.xlsx]

## Sheet: Sheet7
		Supplemental Data 1. Materials information for GWAS
Name	Type	Origin	Name	Type	Origin
WR04-6	Weedy	Liao ning	Pudong1	Weedy	Shang hai
L-161	Weedy	Liao ning	Jiading1	Weedy	Shang hai
J-77	Weedy	Ji lin	Jinshan1	Weedy	Shang hai
L-248	Weedy	Liao ning	Nanhui1	Weedy	Shang hai
L-244	Weedy	Liao ning	Nanhui2	Weedy	Shang hai
H-46	Weedy	Hei longjiang	Chongming1	Weedy	Shang hai
L-246	Weedy	Liao ning	Jiading2	Weedy	Shang hai
H-53	Weedy	Hei longjiang	JC 1	Indica elite cultivar	South China
H-56	Weedy	Hei longjiang	Qi shan zhan	Indica elite cultivar	South China
L-245	Weedy	Liao ning	TN1	Indica elite cultivar	China Taiwan
H-10	Weedy	Hei longjiang	Nante	Indica elite cultivar	South China
H-51	Weedy	Hei longjiang	Zu zhan dao	Indica elite cultivar	South China
H-42	Weedy	Hei longjiang	MH63	Indica elite cultivar	South China
L-173	Weedy	Liao ning	Wuiang	Indica elite cultivar	South China
L-149	Weedy	Liao ning	Firooz	Indica elite cultivar	South China
J-79	Weedy	Ji lin	Habataki	Indica elite cultivar	Japan
L-159	Weedy	Liao ning	XianLand1	Indica landrace	Unknown
L-188	Weedy	Liao ning	XianLand2	Indica landrace	Celebes
H-9	Weedy	Hei longjiang	XianLand3	Indica landrace	Sumbawa
L-199	Weedy	Liao ning	XianLand4	Indica landrace	Celebes
H-43	Weedy	Hei longjiang	XianLand5	Indica landrace	South China
WR07-142	Weedy	Liao ning	XianLand6	Indica landrace	South China
H-31	Weedy	Hei longjiang	XianLand7	Indica landrace	Japan
H-58	Weedy	Hei longjiang	XianLand8	Indica landrace	Japan
H-48	Weedy	Hei longjiang	XianLand9	Indica landrace	Yangtze River region
WR07-141	Weedy	Liao ning	XianLand10	Indica landrace	Japan
L-197	Weedy	Liao ning	XianLand11	Indica landrace	Yangtze River region
WR13-4	Weedy	Liao ning	XianLand12	Indica landrace	Yangtze River region
L-249	Weedy	Liao ning	XianLand13	Indica landrace	Yangtze River region
H-15	Weedy	Hei longjiang	XianLand14	Indica landrace	North China
L-109	Weedy	Liao ning	XianLand15	Indica landrace	Yangtze River region
J-76	Weedy	Ji lin	XianLand16	Indica landrace	China Taiwan
WR13-1	Weedy	Liao ning	XianLand17	Indica landrace	South China
H-20	Weedy	Hei longjiang	XianLand18	Indica landrace	South China
L-236	Weedy	Liao ning	XianLand19	Indica landrace	North China
L-241	Weedy	Liao ning	XianLand20	Indica landrace	Central China
L-243	Weedy	Liao ning	XianLand21	Indica landrace	South China
H-60	Weedy	Hei longjiang	XianLand22	Indica landrace	South China
H-8	Weedy	Hei longjiang	XianLand23	Indica landrace	South China
J-86	Weedy	Ji lin	XianLand24	Indica landrace	South China
L-247	Weedy	Liao ning	XianLand25	Indica landrace	South China
L-237	Weedy	Liao ning	XianLand26	Indica landrace	South China
J-94	Weedy	Ji lin	XianLand27	Indica landrace	South China
H-49	Weedy	Hei longjiang	XianLand28	Indica landrace	South China
WR07-14	Weedy	Liao ning	XianLand29	Indica landrace	South China
WR07-47	Weedy	Liao ning	XianLand30	Indica landrace	South China
WR03-32	Weedy	Liao ning	XianLand31	Indica landrace	South China
WR03-29	Weedy	Liao ning	XianLand32	Indica landrace	South China
Mu yu	Temperate japonca elite cultivar	Japan	XianLand33	Indica landrace	South China
Liao geng 454	Temperate japonca elite cultivar	Liao ning	XianLand34	Indica landrace	South China
Liao geng 326	Temperate japonca elite cultivar	Liao ning	XianLand35	Indica landrace	North China
Shen nong 9741	Temperate japonca elite cultivar	Liao ning	XianLand36	Indica landrace	South China
Yan feng 47	Temperate japonca elite cultivar	Liao ning	XianLand37	Indica landrace	Yunnan-Kweichow Plateau
Liao geng 5	Temperate japonca elite cultivar	Liao ning	XianLand38	Indica landrace	Central China
Long dao 5	Temperate japonca elite cultivar	Hei longjiang	XianLand39	Indica landrace	Central China
Ji geng 63	Temperate japonca elite cultivar	Ji lin	XianLand40	Indica landrace	South China
Shen nong 9816	Temperate japonca elite cultivar	Liao ning	XianLand41	Indica landrace	South China
Long dao 3	Temperate japonca elite cultivar	Hei longjiang	XianLand42	Indica landrace	South China
Chang bai 9	Temperate japonca elite cultivar	Ji lin	XianLand43	Indica landrace	South China
Toyonishiki	Temperate japonca elite cultivar	Japan	XianLand44	Indica landrace	South China
Shen nong 265	Temperate japonca elite cultivar	Liao ning	XianLand45	Indica landrace	South China
Long jing 8	Temperate japonca elite cultivar	Hei longjiang	XianLand46	Indica landrace	Unknown
He jiang 15	Temperate japonca elite cultivar	Hei longjiang	XianLand47	Indica landrace	Central China
Song jing 9	Temperate japonca elite cultivar	Hei longjiang	XianLand48	Indica landrace	South China
Ji jing 56	Temperate japonca elite cultivar	Ji lin	XianLand49	Indica landrace	South China
long geng 13	Temperate japonca elite cultivar	Hei longjiang	XianLand50	Indica landrace	South China
Kong yu 131	Temperate japonca elite cultivar	Hei longjiang	XianLand51	Indica landrace	South China
Nipponbare	Temperate japonca elite cultivar	Japan	XianLand52	Indica landrace	Central China
Ji2843	Temperate japonca elite cultivar	Ji lin	XianLand53	Indica landrace	Central China
Ken dao 10	Temperate japonca elite cultivar	Hei longjiang	XianLand54	Indica landrace	Central China
Ken jian dao 5	Temperate japonca elite cultivar	Hei longjiang	XianLand55	Indica landrace	Central China
Shen nong 606	Temperate japonca elite cultivar	Liao ning	XianLand56	Indica landrace	Central China
Long jing 14	Temperate japonca elite cultivar	Hei longjiang	XianLand57	Indica landrace	Central China
Dong nong 415	Temperate japonca elite cultivar	Hei longjiang	XianLand58	Indica landrace	Central China
Ken dao 8	Temperate japonca elite cultivar	Hei longjiang	XianLand59	Indica landrace	Central China
Ji geng 67	Temperate japonca elite cultivar	Ji lin	XianLand60	Indica landrace	Central China
Sasanishiki	Temperate japonca elite cultivar	Japan	XianLand61	Indica landrace	Central China
Ji yu jing	Temperate japonca elite cultivar	Ji lin	XianLand62	Indica landrace	Central China
Chao chan 1	Temperate japonca elite cultivar	Ji lin	XianLand63	Indica landrace	Central China
Yan geng 23	Temperate japonca elite cultivar	Liao ning	XianLand64	Indica landrace	Central China
Qian chong lang 2	Temperate japonca elite cultivar	Liao ning	XianLand65	Indica landrace	Central China
Ji geng 62	Temperate japonca elite cultivar	Ji lin	XianLand66	Indica landrace	Central China
Shen nong 9903	Temperate japonca elite cultivar	Liao ning	XianLand67	Indica landrace	Central China
Ken dao 12	Temperate japonca elite cultivar	Hei longjiang	XianLand68	Indica landrace	Central China
Ji geng 88	Temperate japonca elite cultivar	Ji lin	XianLand69	Indica landrace	Central China
He jiang 20	Temperate japonca elite cultivar	Hei longjiang	XianLand70	Indica landrace	Central China
Balilla	Temperate japonca elite cultivar	Itali	XianLand71	Indica landrace	Central China
Akihikari	Temperate japonca elite cultivar	North Japan	XianLand72	Indica landrace	Central China
Akitakomachi	Temperate japonca elite cultivar	North Japan	XianLand73	Indica landrace	Central China
Qiutian39	Temperate japonca elite cultivar	North Japan	XianLand74	Indica landrace	Central China
koshihikari	Temperate japonca elite cultivar	Japan	XianLand75	Indica landrace	Central China
GengLand1	Temperate japonca landrace	North China	XianLand76	Indica landrace	South China
GengLand2	Temperate japonca landrace	North China	XianLand77	Indica landrace	South China
GengLand3	Temperate japonca landrace	Yangtze River region	XianLand78	Indica landrace	Japan
GengLand4	Temperate japonca landrace	North China	XianLand79	Indica landrace	Central China
GengLand5	Temperate japonca landrace	Yangtze River region	XianLand80	Indica landrace	Unknown
GengLand6	Temperate japonca landrace	North China	XianLand81	Indica landrace	South China
GengLand7	Temperate japonca landrace	North China	XianLand82	Indica landrace	Japan
GengLand8	Temperate japonca landrace	North China	XianLand83	Indica landrace	South China
GengLand9	Temperate japonca landrace	Yangtze River region	XianLand84	Indica landrace	Taiwan
GengLand10	Temperate japonca landrace	North Japan	XianLand85	Indica landrace	South China
GengLand11	Temperate japonca landrace	Central China	XianLand86	Indica landrace	South China
GengLand12	Temperate japonca landrace	North China	XianLand87	Indica landrace	South China
GengLand13	Temperate japonca landrace	Yangtze River region	XianLand88	Indica landrace	South China
GengLand14	Temperate japonca landrace	North China	XianLand89	Indica landrace	South China
GengLand15	Temperate japonca landrace	North China	XianLand90	Indica landrace	Central China
GengLand16	Temperate japonca landrace	North China	XianLand91	Indica landrace	Central China
GengLand17	Temperate japonca landrace	North China	XianLand92	Indica landrace	Central China
GengLand18	Temperate japonca landrace	North Japan	XianLand93	Indica landrace	Yangtze River region
GengLand19	Temperate japonca landrace	North Japan	XianLand94	Indica landrace	Yangtze River region
GengLand20	Temperate japonca landrace	North Japan	XianLand95	Indica landrace	Yangtze River region
GengLand21	Temperate japonca landrace	North Japan	XianLand96	Indica landrace	Yangtze River region
GengLand22	Temperate japonca landrace	North China	XianLand97	Indica landrace	Taiwan
GengLand23	Temperate japonca landrace	Yangtze River region	XianLand98	Indica landrace	South China
GengLand24	Temperate japonca landrace	North China	XianLand99	Indica landrace	Taiwan
GengLand25	Temperate japonca landrace	Central China	XianLand100	Indica landrace	North China
GengLand26	Temperate japonca landrace	Yangtze River region	XianLand101	Indica landrace	South China
Manik	Temperate japonca landrace	Southeast Asia	XianLand102	Indica landrace	South China
GAJO	Temperate japonca landrace	Southeast Asia	XianLand103	Indica landrace	South China
IAC25	Temperate japonca landrace	Southeast Asia	XianLand104	Indica landrace	South China
Aenpetu	Temperate japonca landrace	Southeast Asia	XianLand105	Indica landrace	Central China
Payakan	Temperate japonca landrace	Southeast Asia	XianLand106	Indica landrace	Central China
Libu	Temperate japonca landrace	Southeast Asia	XianLand107	Indica landrace	Central China
sipde-k	Temperate japonca landrace	Southeast Asia	XianLand108	Indica landrace	Central China
Padi lasat	Temperate japonca landrace	Southeast Asia	XianLand109	Indica landrace	North China
Siampang	Temperate japonca landrace	Southeast Asia	XianLand110	Indica landrace	North China
Padi Kenikir Puti	Temperate japonca landrace	Southeast Asia	XianLand111	Indica landrace	Yangtze River region
Masumikir	Temperate japonca landrace	Southeast Asia	XianLand112	Indica landrace	Yunnan-Kweichow Plateau
Bodat Mayang	Temperate japonca landrace	Southeast Asia	XianLand113	Indica landrace	Yangtze River region
Chumku	Aromatic	South Asia	XianLand114	Indica landrace	South China
Pankhari203	Aromatic	South Asia	XianLand115	Indica landrace	Japan
JC101	Aromatic	South Asia	XianLand116	Indica landrace	Yangtze River region
Qingpu1	Weedy	Shang hai	XianLand117	Indica landrace	Yangtze River region
Pudong3	Weedy	Shang hai	XianLand118	Indica landrace	Yunnan-Kweichow Plateau
Chongming3	Weedy	Shang hai	XianLand119	Indica landrace	South China
Chongming2	Weedy	Shang hai	XianLand120	Indica landrace	Low latitude region
Pudong2	Weedy	Shang hai	XianLand121	Indica landrace	South China
Qingpu2	Weedy	Shang hai	XianLand122	Indica landrace	South China
Fengxian1	Weedy	Shang hai	XianLand123	Indica landrace	South China
Lingshui hongmi	Weedy	Shang hai	XianLand124	Indica landrace	Yunnan
Bate Aus	Aus	South Asia	XianLand125	Indica landrace	South China
JC 70	Aus	South Asia	XianLand126	Indica landrace	South China
Bhat Mukhu	Aus	South Asia	XianLand127	Indica landrace	Central China
Bena Jhupi	Aus	South Asia	XianLand128	Indica landrace	Central China
Hoshi Kalmi	Aus	South Asia	XianLand129	Indica landrace	Central China
Dular	Aus	South Asia	XianLand130	Indica landrace	Central China
N22	Aus elite cultivar	South Asia	XianLand131	Indica landrace	Central China
colom bo	Aus	South Asia	XianLand132	Indica landrace	North China
BJ 1	Aus	South Asia
